# Supplementary material for: Whole Exome Sequencing Identifies Novel Germline Variants of SLC15A4 Gene as Potentially Cancer Predisposing in Familial Colorectal Cancer
Source: Preprints.org preprint supplement (doi:10.20944/preprints202103.0257.v1), 2021-03-09
Supplement: Supplementary file 1 [file supplementary]

**Table S1.** Details of multiple sequence alignment. Selected representative species with their respective NCBI (National Center for Biotechnology Information) accession numbers for *SLC15A4* and *PTGES* gene are summarized.

| Species | Common Name | NCBI Accession Numbers | |
| --- | --- | --- | --- |
| ***SLC15A4*** | ***PTGES*** |
| Homo sapiens | **Human** | NP_663623.1 | NP_004869.1 |
| Mus musculus | **Mouse** | NP_598656.1 | NP_071860.1 |
| Rattus norvegicus | **Norway rat** | NP_653359.1 | NP_067594.1 |
| Oryctolagus cuniculus | **Rabbit** | XP_002722114.3 | XP_017194907.1 |
| Gallus gallus | **Chicken** | XP_415099.3 | NP_001181912.1 |
| Pan troglodytes | **Chimpanzee** | XP_016780109.2 | XP_009455764.2 |
| Pongo abelii | **Sumatran orangutan** | XP_002824029.2 | XP_002820341.1 |
| Callithrix jacchus | **Marmoset** | XP_009003149.3 | XP_002743420.1 |
| Macaca mulatta | **Rhesus monkey** | XP_014965182.2 | NP_001248097.1 |
| Tupaia chinensis | **Chinese tree shrew** | XP_006147431.2 | XP_006154174.2 |
| Sapajus apella | **Tufted capuchin** | XP_032100059.1 | XP_032113453.1 |
| Bos taurus | **Cattle** | NP_001095397.2 | NP_776868.1 |

**
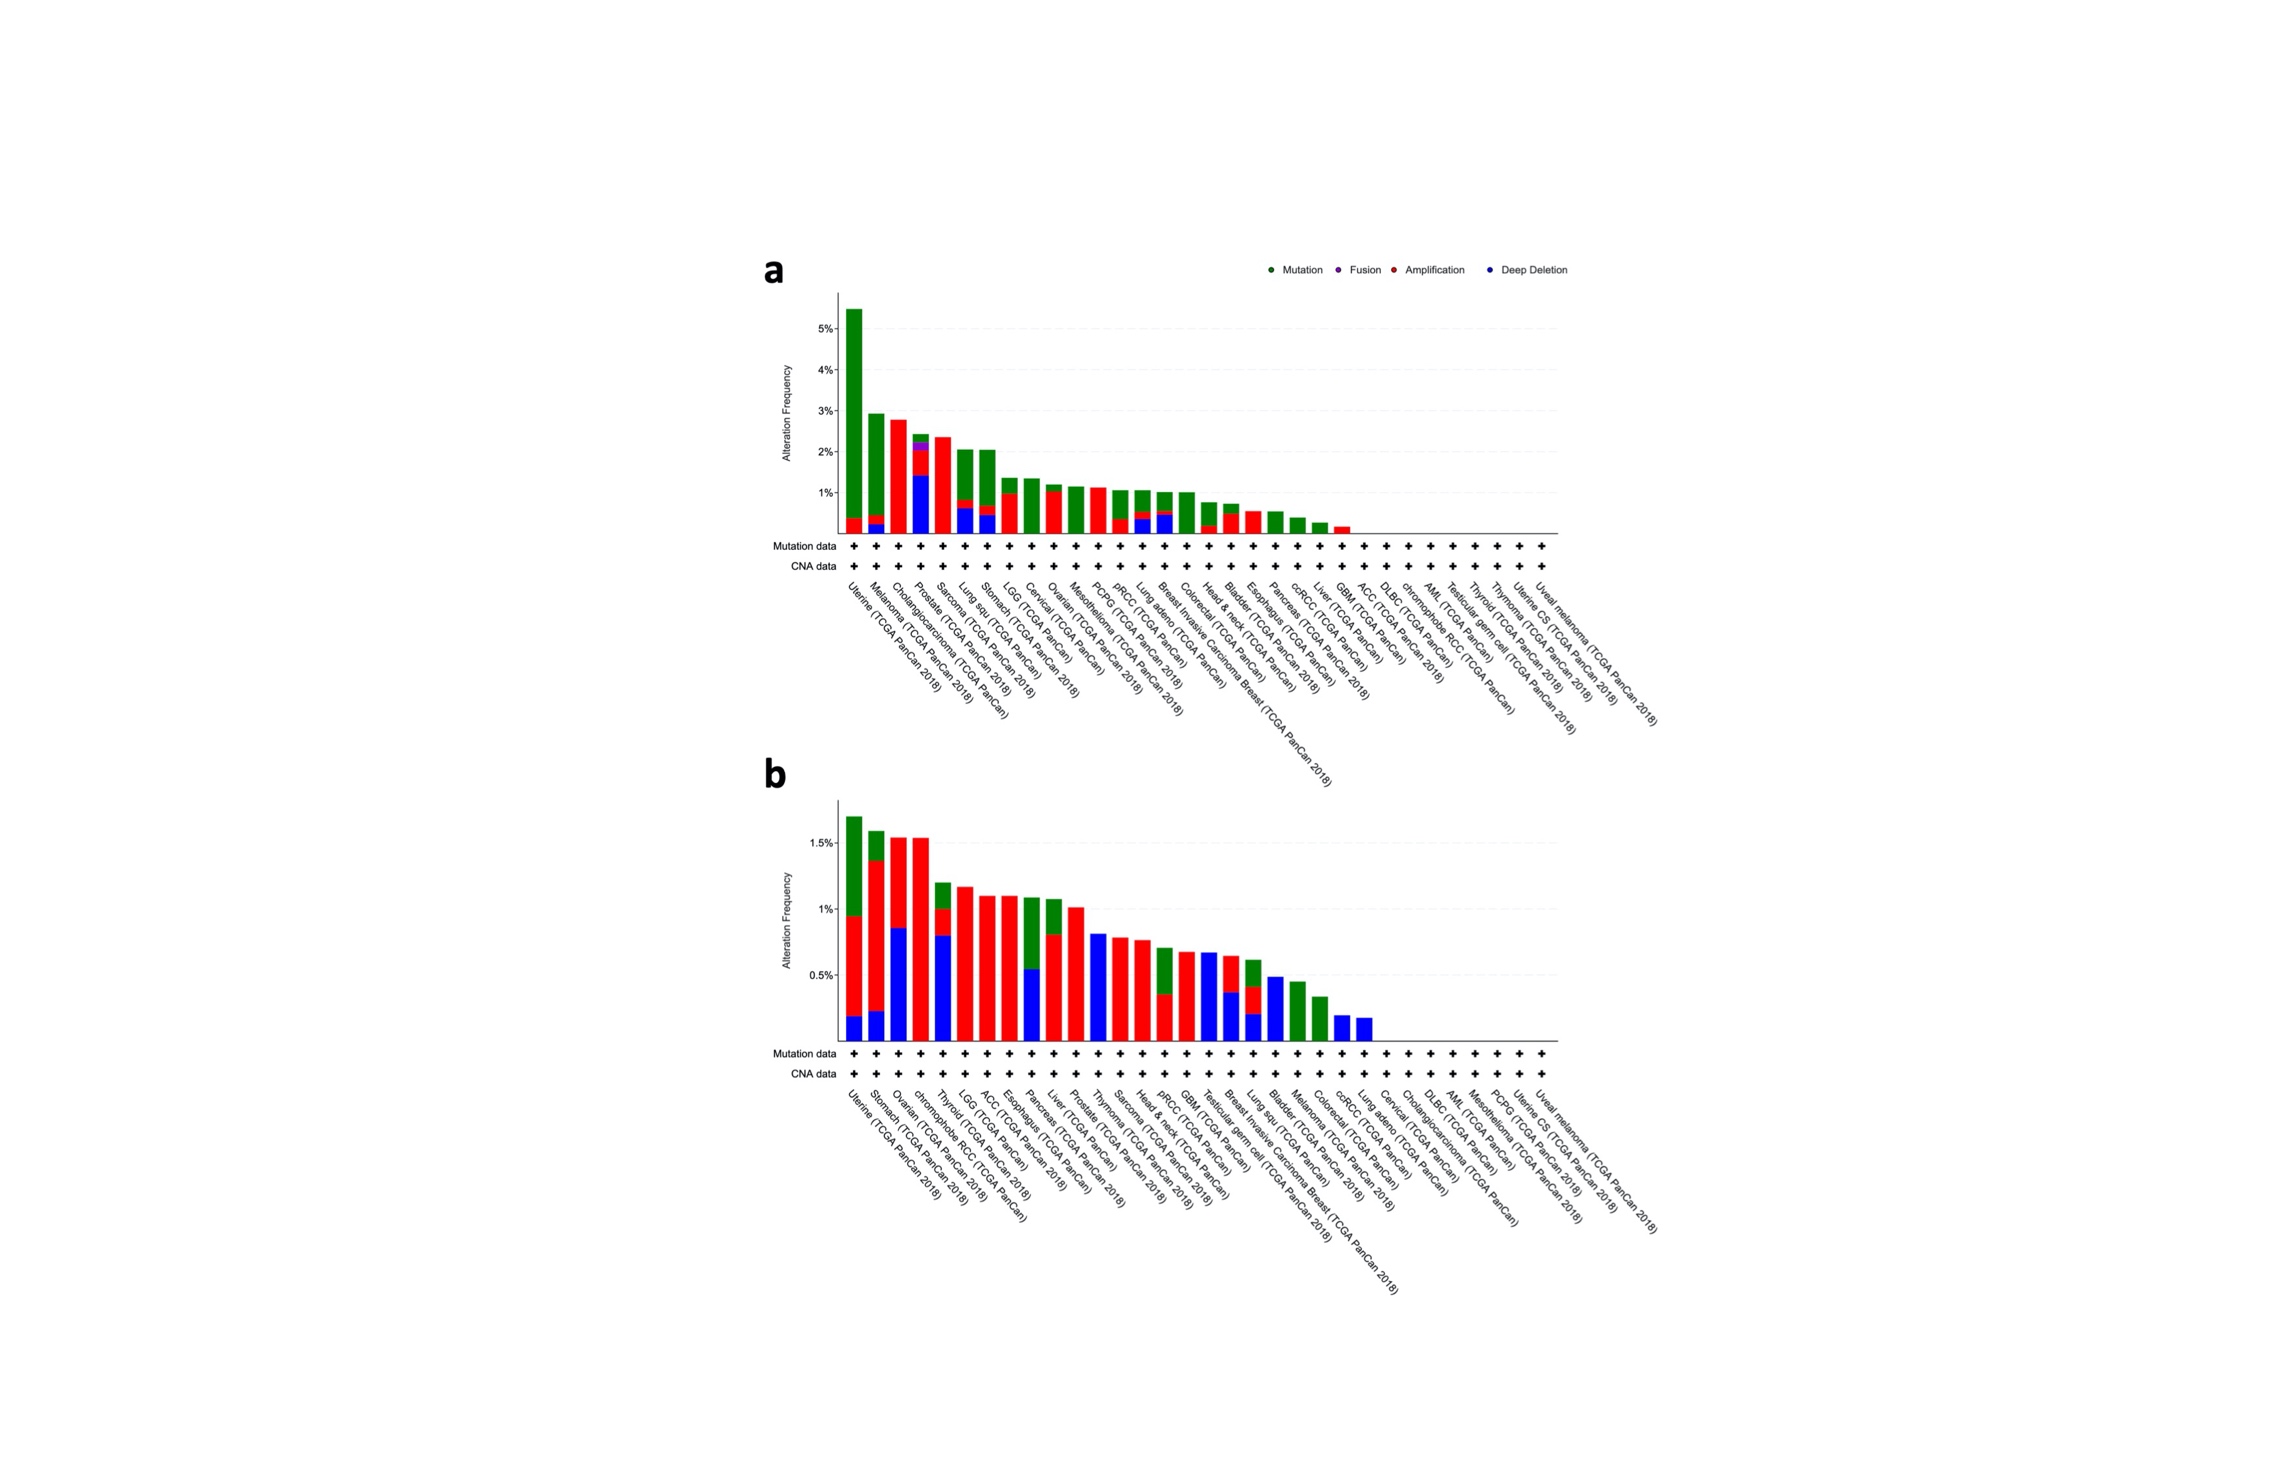
**

**Figure S1** Histograms of alteration frequencies in different cancers. Data were extracted from cBioPortal (www.cbioportal.org) on 13th of December 2020 using TCGA PanCancer data.

**(a)** Alteration frequencies reported for *SLC15A4*. **(b)** Alteration frequencies reported for *PTGES*.
